# Supplementary material for: A Unified Framework for the Infection Dynamics of Zoonotic Spillover and Spread
Source: PLOS journal article supplement (doi:10.1371/journal.pntd.0004957), 2016-09-02
Supplement: S4 (10.1371/journal.pntd.0004957.s004) [file journal.pntd.0004957.s004]

**S4 Text. Effects of different functional forms of the exposure and prevalence on the rate of spillovers.**

**Table S1.** Effects of different functional forms of the exposure  $\eta(N_R)$  and prevalence  $Pr_R(N_R)$  on the mean and variance  $\mu_\lambda$  and  $\sigma_\lambda^2$  of the rate of spillovers.  $C$  and  $D$  are constants.

|            | $\eta(N_R), Pr_R(N_R), \lambda$                                   | $\mu_\lambda, \sigma_\lambda$                                                                                                                                                                                                                                                 | Notes                                                                                                                                                                                                                                                 |
|------------|-------------------------------------------------------------------|-------------------------------------------------------------------------------------------------------------------------------------------------------------------------------------------------------------------------------------------------------------------------------|-------------------------------------------------------------------------------------------------------------------------------------------------------------------------------------------------------------------------------------------------------|
| Scenario 1 | $\eta(N_R) \propto N_R$                                           | $\mu_\lambda = C\mu_{N_H}\mu_{N_R}\mu_{\chi_R}$                                                                                                                                                                                                                               | Exposure proportional to host abundance. Infection prevalence does not depend on host abundance. <i>E.g.</i> a scenario described by a frequency dependent SIR model with fixed population at endemic equilibrium [1].                                |
|            | $Pr(N_R)$ not dependent on $N_R$                                  | $\sigma_\lambda^2 \approx (CN_R\chi_R)^2 \sigma_{N_H}^2 +$<br>$(CN_H\chi_R)^2 \sigma_{N_R}^2 + (CN_HN_R)^2 \sigma_{\chi_R}^2$                                                                                                                                                 |                                                                                                                                                                                                                                                       |
|            | $\lambda = CN_HN_R\chi_R$                                         |                                                                                                                                                                                                                                                                               |                                                                                                                                                                                                                                                       |
| Scenario 2 | $\eta(N_R) = \eta_\infty$                                         | $\mu_\lambda = C\mu_{N_H}\eta_\infty\mu_{\chi_R}$                                                                                                                                                                                                                             | Exposure does not depend on host abundance. Infection prevalence does not depend on host abundance. <i>E.g.</i> a scenario where the probability of contacts saturates for a large $N_{R\infty}$ asymptotically approaching the value $\eta_\infty$ . |
|            | $Pr(N_R)$ not dependent on $N_R$                                  | $\sigma_\lambda^2 \approx$<br>$(C\eta_\infty\chi_R)^2 \sigma_{N_H}^2 + (CN_H\eta_\infty)^2 \sigma_{\chi_R}^2$                                                                                                                                                                 |                                                                                                                                                                                                                                                       |
|            | $\lambda = CN_H\eta_\infty\chi_R$                                 |                                                                                                                                                                                                                                                                               |                                                                                                                                                                                                                                                       |
| Scenario 3 | $\eta(N_R) \propto N_R$                                           | $\mu_\lambda = C\mu_{N_H}\mu_{\chi_R} [1 - D\mu_{N_R}]$                                                                                                                                                                                                                       | Exposure proportional to host abundance as in scenario 1. Infection prevalence also depends on host abundance. This form of prevalence arises, <i>e.g.</i> , from a density dependent SI model with fixed birth rate at endemic equilibrium.          |
|            | $Pr(N_R) = 1 - \frac{D}{N_R}$                                     | $\sigma_\lambda^2 \approx [C(N_R - D)\chi_R]^2 \sigma_{N_H}^2 +$<br>$[CN_H\chi_R]^2 \sigma_{N_R}^2 + [CN_H(N_R - D)]^2 \sigma_{\chi_R}^2$                                                                                                                                     |                                                                                                                                                                                                                                                       |
|            | $\lambda = CN_H(N_R - D)\chi_R$                                   |                                                                                                                                                                                                                                                                               |                                                                                                                                                                                                                                                       |
| Scenario 4 | $\eta(N_R) = \eta_\infty$                                         | $\mu_\lambda = \eta_\infty\mu_{N_H}\mu_{\chi_R} [1 - D\mu_{1/N_R}]$                                                                                                                                                                                                           | Exposure does not depend on host abundance as in scenario 2. Infection prevalence depends on host abundance as in scenario 3.                                                                                                                         |
|            | $Pr(N_R) = 1 - \frac{D}{N_R}$                                     | $\sigma_\lambda^2 \approx \left[\eta_\infty \left(1 - \frac{D}{N_R}\right) \chi_R\right]^2 \sigma_{N_H}^2 +$<br>$\left[\eta_\infty N_H \frac{D}{N_R^2} \chi_R\right]^2 \sigma_{N_R}^2 +$<br>$\left[\eta_\infty N_H \left(1 - \frac{D}{N_R}\right)\right]^2 \sigma_{\chi_R}^2$ |                                                                                                                                                                                                                                                       |
|            | $\lambda = \eta_\infty N_H \left(1 - \frac{D}{N_R}\right) \chi_R$ |                                                                                                                                                                                                                                                                               |                                                                                                                                                                                                                                                       |

## References

1. Keeling MJ, Rohani P. Modeling Infectious Diseases in Humans and Animals. Princeton University Press; 2008.
