# Supplementary material for: A Unified Framework for the Infection Dynamics of Zoonotic Spillover and Spread
Source: PLOS journal article supplement (doi:10.1371/journal.pntd.0004957), 2016-09-02
Supplement: S5 (10.1371/journal.pntd.0004957.s005) [file journal.pntd.0004957.s005]

**S5 Text. Transition probabilities for the ABM.**

**Table S1.** Transition Probabilities used in the ABM

| Model                                                                              | Transition Probability                            | Notes                                                                                                                                  |
|------------------------------------------------------------------------------------|---------------------------------------------------|----------------------------------------------------------------------------------------------------------------------------------------|
| <b>Pure Zoonotic Spillover</b><br>(Simple Poisson model)                           | $\Lambda_R \tau / N_H$                            | the rate of change in the limiting Poisson process is therefore the constant $\lambda(t_j) = \Lambda_R \tau$                           |
| <b>Zoonotic Spillover with depletion of susceptibles</b> (Self-Correcting Poisson) | $\Lambda_R \tau / S_H$                            | the rate of change in the limiting Poisson process is therefore the constant $\tilde{\lambda}(t_j) = \Lambda_R \tau$                   |
| <b>Human-to-human transmission</b> (Self-Exciting Poisson)                         | $\Lambda_H \tau / S_H$                            | the rate of change in the limiting Poisson process is therefore the time-dependent $\hat{\lambda}(t_j) = \Lambda_H \tau$               |
| <b>Zoonotic Spillover with human-to-human transmission</b> (Poisson with Feedback) | $\Lambda_R \tau / S_H$ and $\Lambda_H \tau / S_H$ | the rate of change in the limiting Poisson process is therefore the time-dependent $\hat{\lambda}(t_j) = (\Lambda_R + \Lambda_H) \tau$ |
