# Supplementary material for: A Unified Framework for the Infection Dynamics of Zoonotic Spillover and Spread
Source: PLOS journal article supplement (doi:10.1371/journal.pntd.0004957), 2016-09-02
Supplement: S11 (10.1371/journal.pntd.0004957.s011) [file journal.pntd.0004957.s011]

**S11 Text. Application to Lassa Fever. Zoonotic Spillover with human-to-human transmission when random effect in the rate are important.**

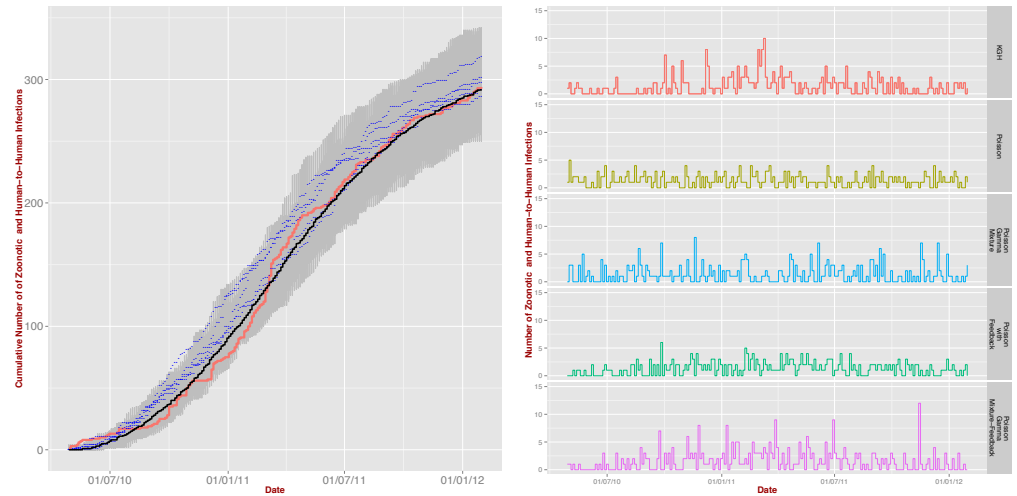

**Fig S1.** (a) Predicted cumulative number of zoonotic and human-to-human infections governed by the ‘Poisson-Gamma Mixture with Feedback’ model with  $\lambda$  drawn from a gamma distribution (equations (12) and (S2)). (b) Time-series of the number of referred/visiting patients at KGH (confirmed cases only) from the 27th of April 2010 to the 31st of January 2012, time resolution  $\tau = 3$  days. Four different models are considered: ‘Simple Poisson’ (Eq (1)); ‘Poisson-Gamma Mixture’ (Eq (1), with  $\lambda$  drawn from a gamma distribution, Eq (S2)); ‘Poisson with Feedback’ (equations (5)-(8)); The parameters are optimized with the data from KGH by employing maximum-likelihood (‘Simple Poisson’ and ‘Poisson-Gamma Mixture’) and MCMC approach in R [1,2].

## References

1. Park JH, Quinn KM, Martin AD. MCMCpack: Markov Chain Monte Carlo in R. Journal of Statistical Software. 2011;42:323.
2. R Development Core Team. R: A Language and Environment for Statistical Computing; 2011. Available from: <http://www.R-project.org/>.
